# Supplementary material for: Glaciological characteristics in the Dome Fuji region and new assessment for “Oldest Ice”
Source: Copernicus journal article supplement (doi:10.5194/tc-12-2413-2018), 2018-07-25

Supplement of The Cryosphere, 12, 2413–2424, 2018  
<https://doi.org/10.5194/tc-12-2413-2018-supplement>  
© Author(s) 2018. This work is distributed under  
the Creative Commons Attribution 4.0 License.

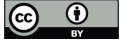

*Supplement of*

## **Glaciological characteristics in the Dome Fuji region and new assessment for “Oldest Ice”**

**Nanna B. Karlsson et al.**

*Correspondence to:* Nanna B. Karlsson ([nanna.karlsson@awi.de](mailto:nanna.karlsson@awi.de))

The copyright of individual parts of the supplement might differ from the CC BY 4.0 License.

## Content

Supplementary Fig. S1: Histograms of ice thicknesses for 10km, 5km, 1km and 500m grids.

Supplementary Fig. S2: Map of locations for Suppl. Figs. S3-S6

Supplementary Fig. S3-S6: Examples of radargrams and continuity index values for different radar lines including areas with evidence of subglacial lakes.

Supplementary Fig. S7: Balance velocities from the study area.

# Supplementary Fig. S1

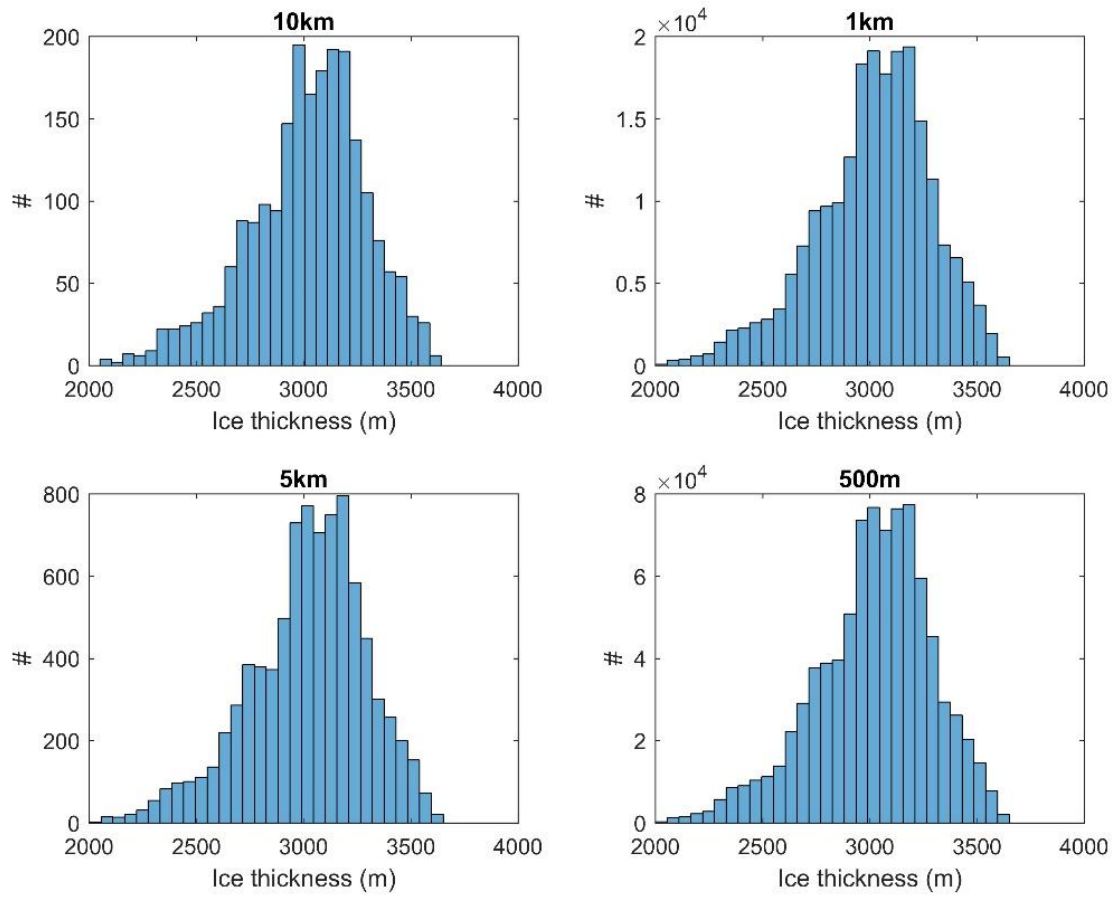

Histograms of ice thicknesses for 10km, 5km, 1km and 500m grids.

## Supplementary Fig. S2

Map of locations for Suppl. Figs. S3-S6

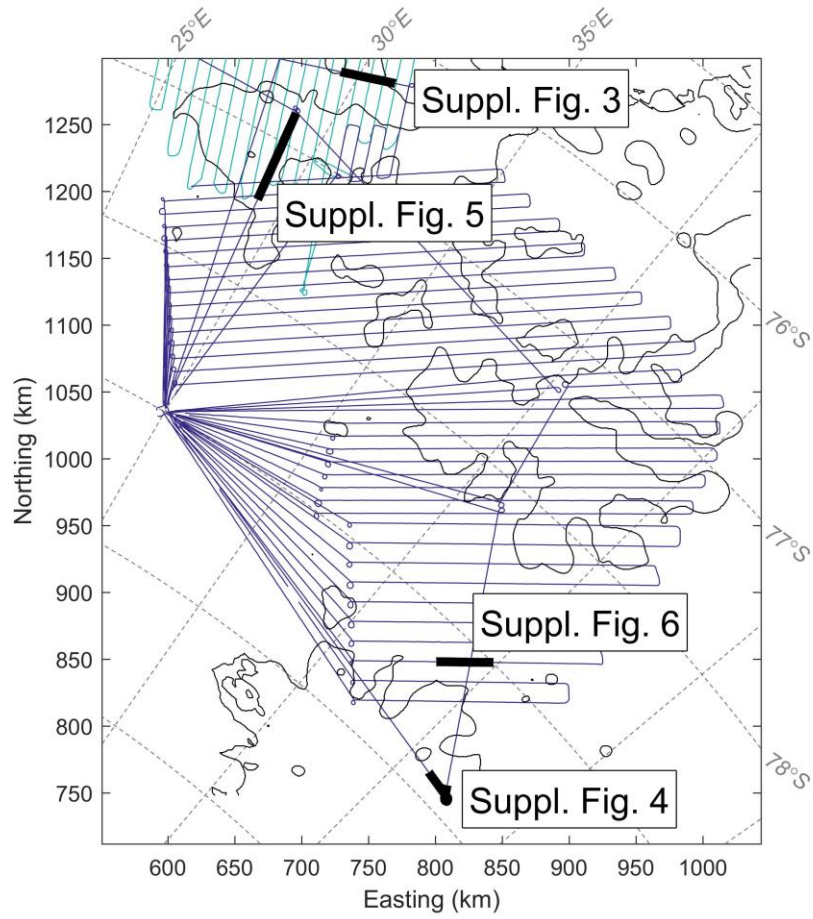

### Supplementary Fig. S3

Example of radargram, continuity index and  $\Delta G$  values for a radar line. If the value for  $\Delta G$  is below  $5\text{mW}/\text{m}^2$  it is not shown in the plot.

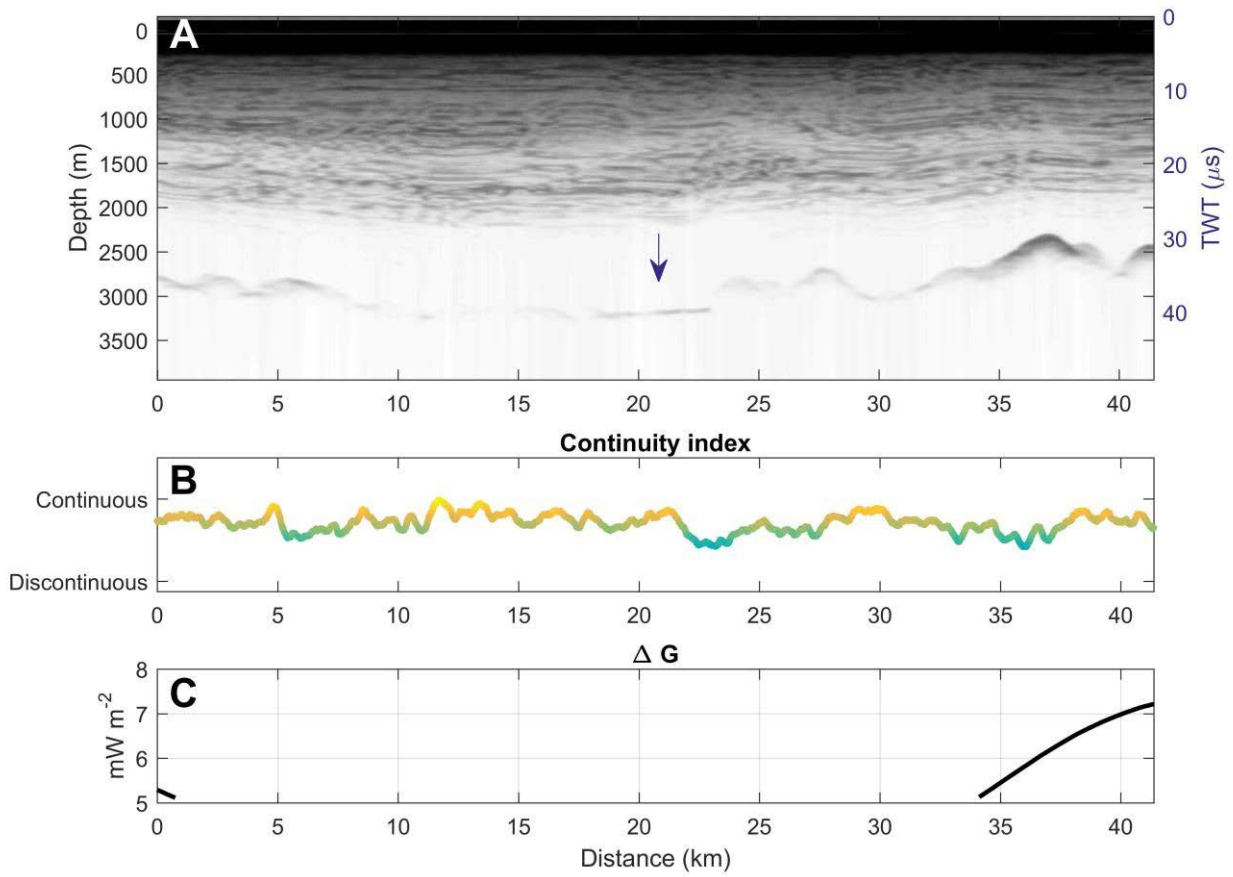

## Supplementary Fig. S4

Example of radargram, continuity index and  $\Delta G$  values for a radar line. If the value for  $\Delta G$  is below  $5\text{mW/m}^2$  it is not shown in the plot.

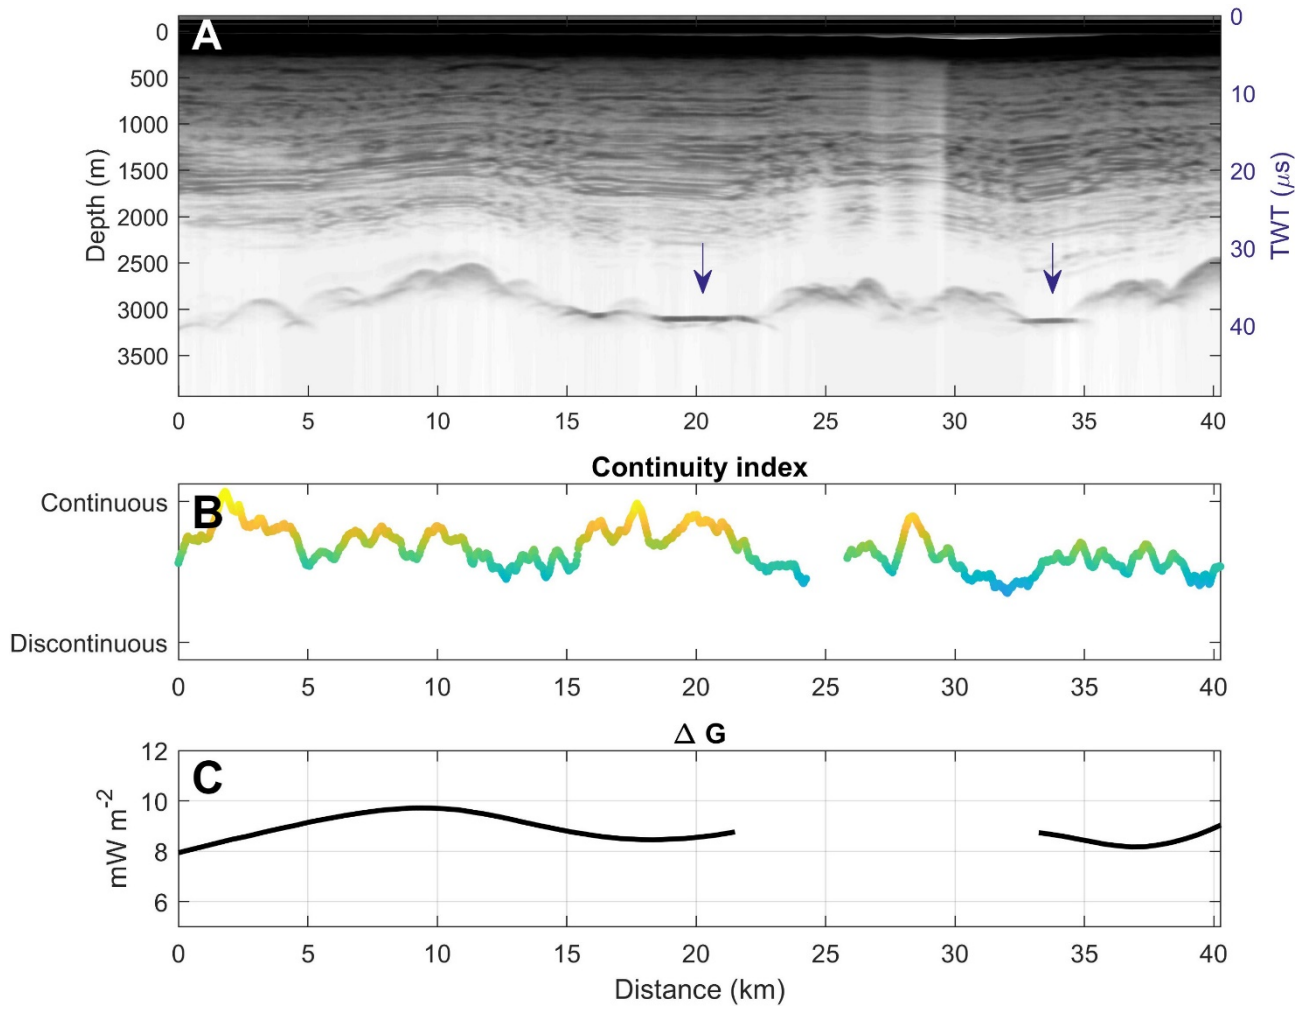

### Supplementary Fig. S5

Example of radargram, continuity index and  $\Delta G$  values for a radar line. If the value for  $\Delta G$  is below  $5\text{mW/m}^2$  it is not shown in the plot.

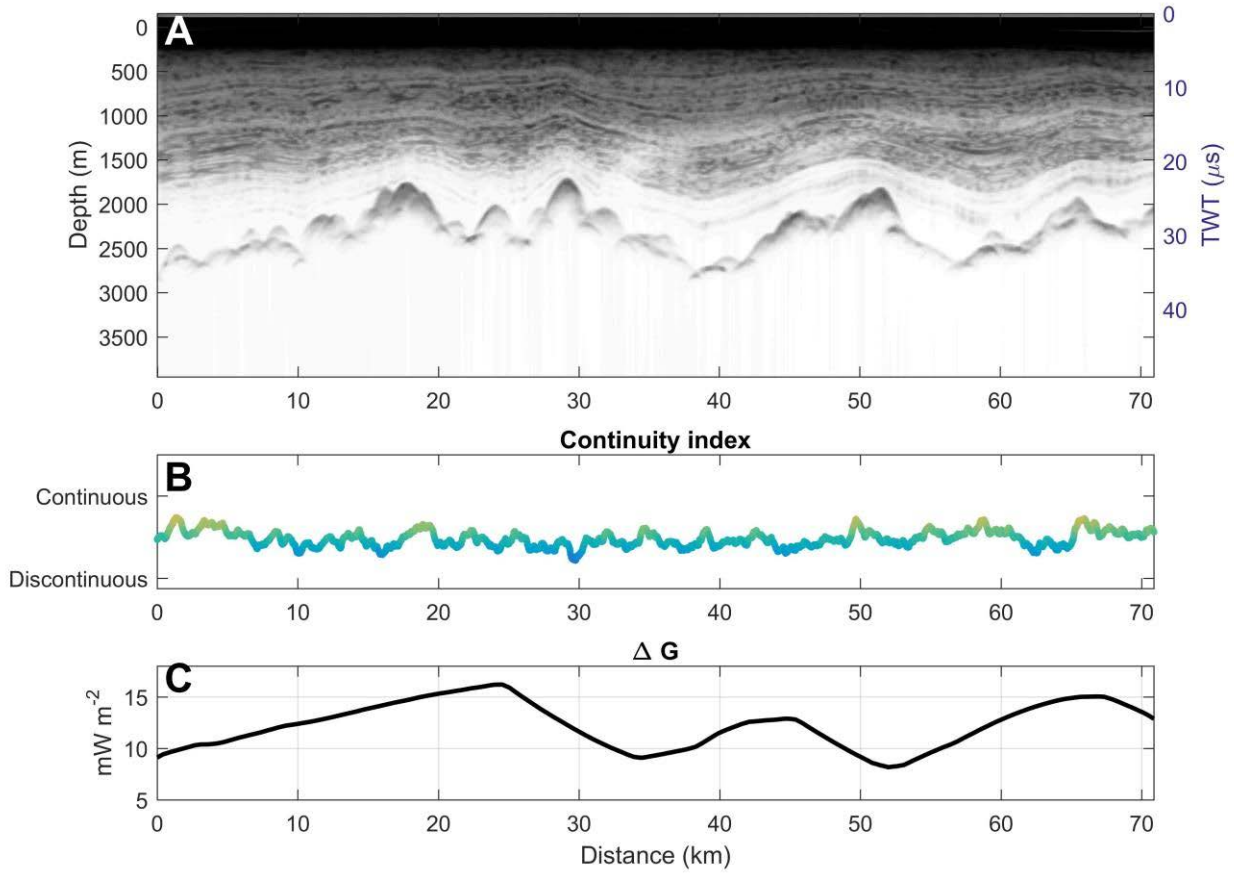

## Supplementary Fig. S6

Example of radargram and continuity index for a radar line (here  $\Delta G$  is below threshold value).

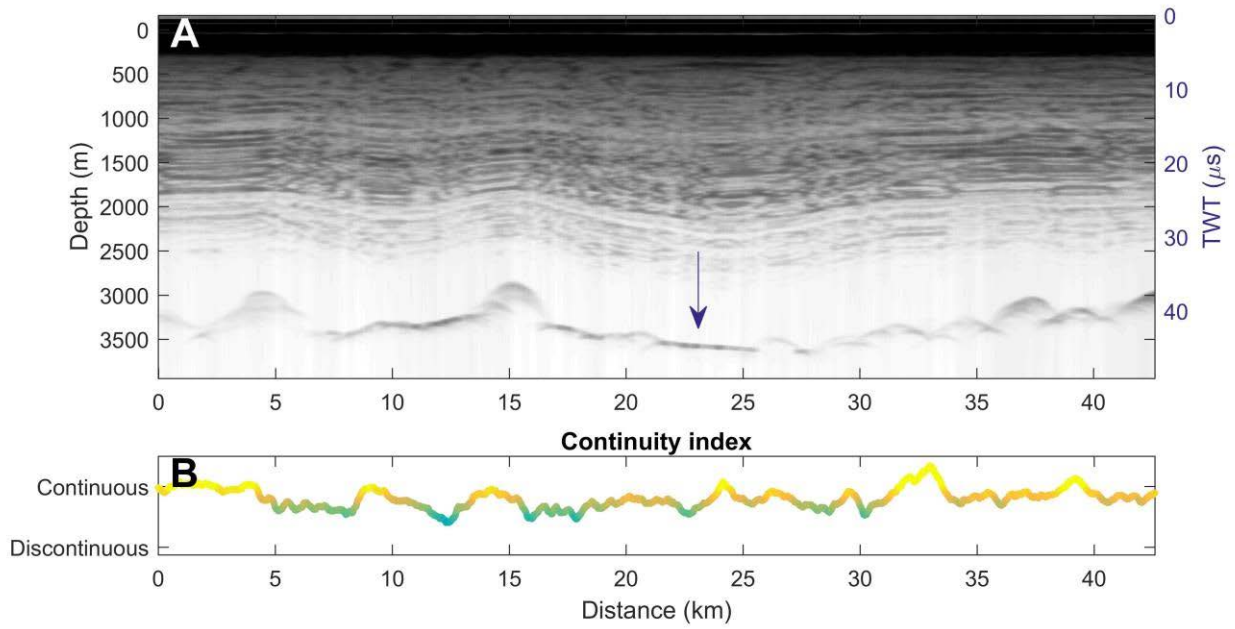



### Supplementary Fig. S7

Balance velocities from the model. The black lines show the new locations for Oldest Ice, the white contours outline the 1m/a and 2m/a velocities.

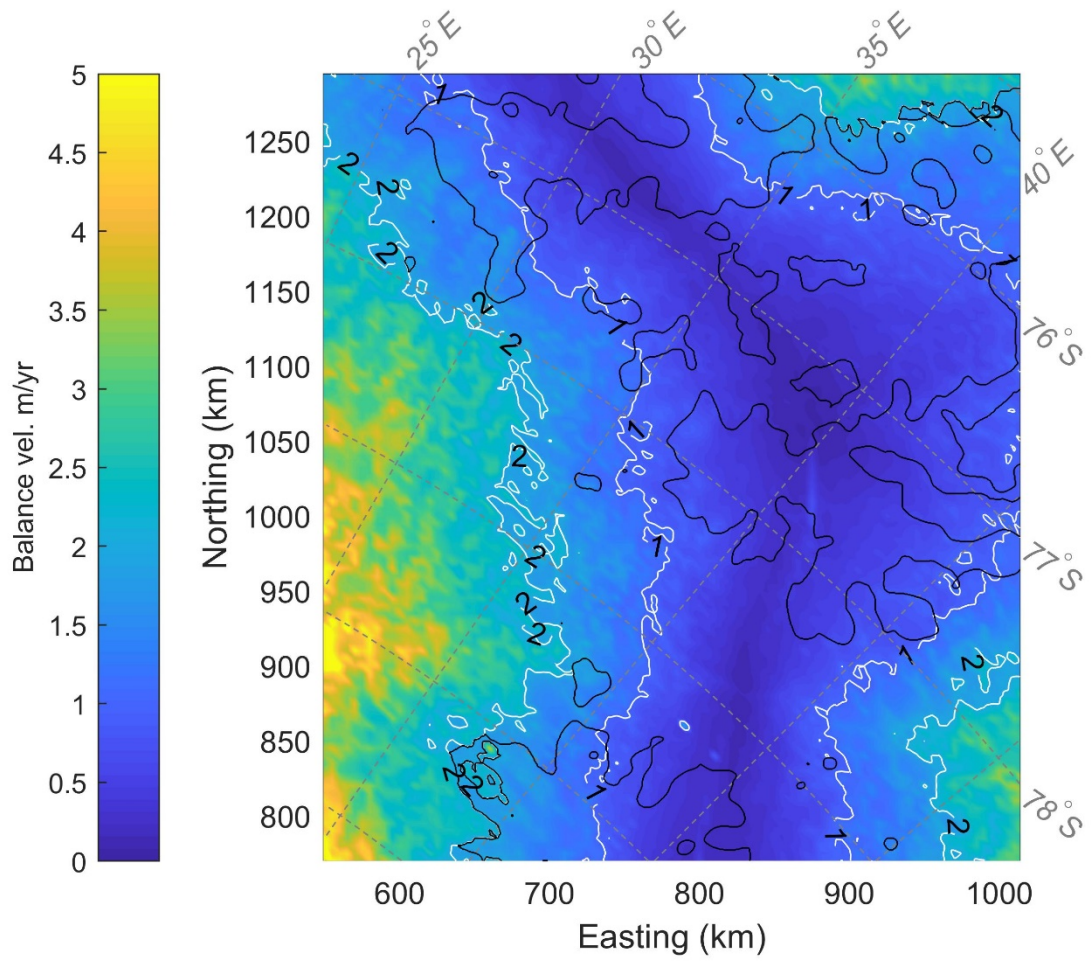

Supplement: Supplementary file [file tc-12-2413-2018-supplement.pdf]
